# Supplementary material
Source: HighWire-hosted journal article supplement (https://tobaccocontrol.bmj.com/content/tobaccocontrol-2016-053209)
Supplement: inline-supplementary-material-1 [file inline-supplementary-material-1.pdf]

Supplementary Table 1

| Mentholated Snus product. <sup>1</sup> | Pouch weight (mg). <sup>1</sup> | Estimated menthol per pouch (mg). <sup>1,2</sup> | Estimated lower end of menthol concentration in saliva (mg/ml) | Estimated higher end of menthol concentration in saliva (mg/ml) |
|----------------------------------------|---------------------------------|--------------------------------------------------|----------------------------------------------------------------|-----------------------------------------------------------------|
| Camel Snus, Medium                     | 531                             | 1.64-2.8                                         | 0.041- 0.082<br>(262 $\mu$ M – 524 $\mu$ M)                    | 0.07 - 0.14<br>(445 $\mu$ M -890 $\mu$ M)                       |
| Camel Snus, Large                      | 970                             | 3.0-5.09                                         | 0.075 - 0.15<br>(477 $\mu$ M - 954 $\mu$ M)                    | 0.13 - 0.26<br>(827 $\mu$ M - 1.66 mM)                          |

Calculation of estimated range of menthol concentrations in saliva upon consumption of a single snus pouch. The weights of mentholated snus pouches were based on Stepanov et al., 2012. The range of menthol amounts per pouch of 3.09 mg/g and 5.25 mg/g was based on Chen et al, 2010. The range of menthol concentration in the saliva was based on the assumption that the stimulated saliva flow was 1-2 ml/m and a pouch is used for 20 minutes.<sup>3</sup>

1. Stepanov I, Jensen J, Biener L, et al. Increased pouch sizes and resulting changes in the amounts of nicotine and tobacco-specific N-nitrosamines in single pouches of Camel Snus and Marlboro Snus. *Nicotine Tob Res* 2012;**14**(10):1241-5.
2. Chen C, Isabelle LM, Pickworth WB, et al. Levels of mint and wintergreen flavorants: smokeless tobacco products vs. confectionery products. *Food Chem Toxicol* 2010;**48**(2):755-63.
3. Navazesh M, Christensen C, Brightman V. Clinical criteria for the diagnosis of salivary gland hypofunction. *J Dent Res* 1992;**71**(7):1363-9.
